# Supplementary material for: Inhibition of SARS-CoV-2 3CLpro by chemically modified tyrosinase from Agaricus bisporus
Source: Royal Society of Chemistry journal article supplement (doi:10.1039/d4md00289j), 2024-01-01
Supplement: d4md00289j1.pdf [file d4md00289j1.pdf]

## Supplementary information

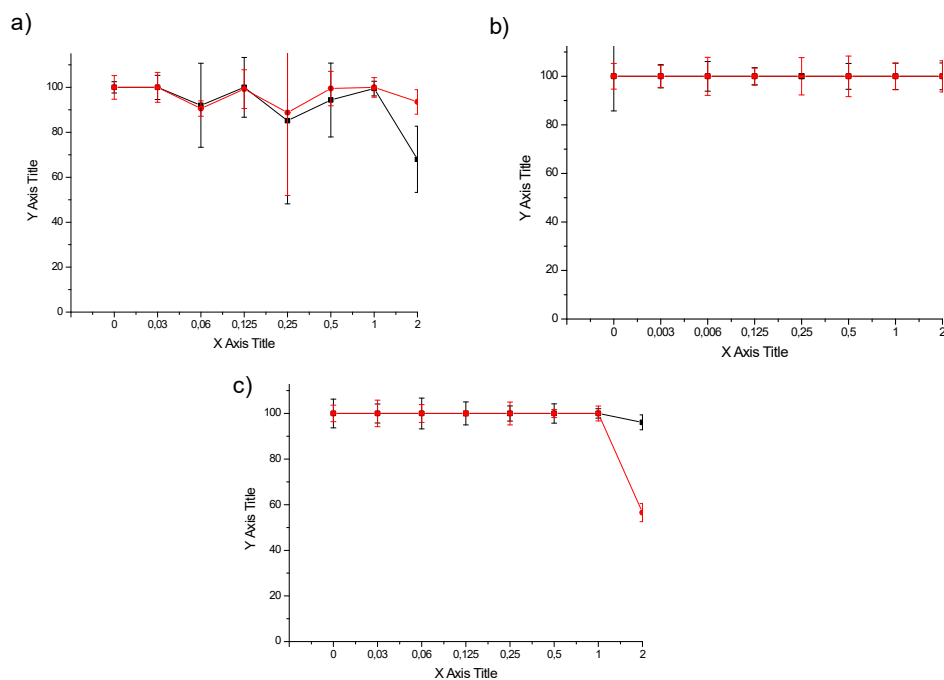

**Figure S1.** Cytotoxicity of the AbTyr and different polymers against Hub7 cells. A) AbTyr, b) Dex-6000, c) Dext2M. blank (red line), sample (black line).
